# Supplementary material
Source: Springer Nature journal article supplement (https://www.springermedizin.de/resource/supplementary/12879_2011_2109_MOESM5_ESM.pdf/9443712)
Supplement: MOESM5 [file 9443712]

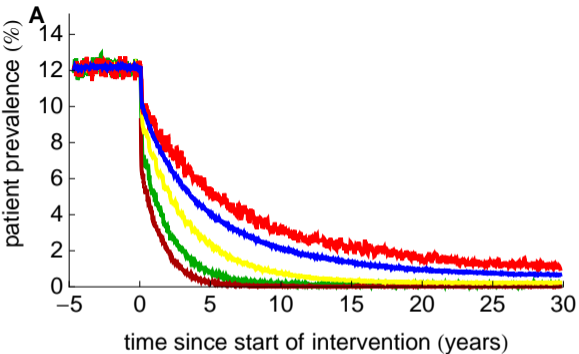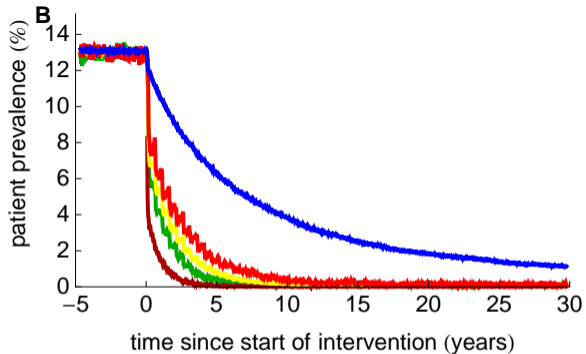

- Isol. eff. 50%, no HCW decol.
- Isol. eff. 25%, HCW decol. 2/year
- Isol. eff. 50%, HCW decol. 2/year
- Isol. eff. 75%, HCW decol. 2/year
- Decol. eff. 100%, no HCW decol.
